# Supplementary material for: Comprehensive Analysis of the Complete Mitochondrial Genome of Rehmannia chingii: An Autotrophic Species in the Orobanchaceae Family
Source: MDPI journal article supplement (doi:10.3390/genes15010098), 2024-01-15
Supplement: s1 [file s1]

**Table S1** Results of the *R. chingii* mitogenome

| Scaffold | Length(bp) | Depth(×) | Scaffold | Length(bp) | Depth(×) |
|----------|------------|----------|----------|------------|----------|
| 1        | 249,921    | 360.0    | 7        | 33,548     | 222.0    |
| 2        | 90,804     | 399.0    | 8        | 28,618     | 327.0    |
| 3        | 59,096     | 353.0    | 9        | 27,917     | 283.0    |
| 4        | 55,758     | 372.0    | 10       | 14,750     | 636.0    |
| 5        | 41,969     | 311.0    | 11       | 10,655     | 653.0    |
| 6        | 38,023     | 254.0    | 12       | 1,272      | 661.0    |

**Table S2** Verification of 16 connection relationships in the *R. chingii* mitogenome

| Lable | Length | Average pident | Toal scaffold<br>(>1000bp) | scaffolds support | E value < 1e-5 |
|-------|--------|----------------|----------------------------|-------------------|----------------|
| 4_8   | 56,758 | 99.70%         | 501                        | 10(score)         | 100%           |
| 4_9   | 56,758 | 99.70%         | 501                        | 10(score)         | 100%           |
| 7_1   | 34,548 | 99.78%         | 502                        | 1(sacffolds)      | 100%           |
| 7_3   | 34,548 | 99.77%         | 310                        | 20(score)         | 100%           |
| 10_4  | 15,750 | 99.71%         | 500                        | 65(scaffolds)     | 100%           |
| 10_5  | 15,750 | 99.72%         | 500                        | 77(sacffolds)     | 100%           |
| 10_7  | 15,750 | 99.72%         | 500                        | 88(scaffolds)     | 100%           |
| 10_9  | 15,750 | 99.72%         | 500                        | 71(scaffolds)     | 100%           |
| 11_1  | 11,655 | 99.77%         | 500                        | 217(scaffolds)    | 100%           |
| 11_2  | 11,655 | 99.76%         | 500                        | 254(scaffolds)    | 100%           |
| 11_6  | 11,655 | 99.78%         | 500                        | 231(scaffolds)    | 100%           |
| 11_8  | 11,655 | 99.77%         | 500                        | 213(sacffolds)    | 100%           |
| 12_2  | 2,272  | 99.82%         | 500                        | 500(scaffolds)    | 100%           |
| 12_3  | 2,272  | 99.78%         | 500                        | 500(scaffolds)    | 100%           |
| 12_5  | 2,272  | 99.87%         | 500                        | 500(scaffolds)    | 100%           |
| 12_6  | 2,272  | 99.80%         | 500                        | 500(scaffolds)    | 100%           |

**Table S3** The codon uses and the RSCU value in the *R. chingii* mitogenome

| Amino acid | Codon | Frequency of use | RSCU | Amino acid | Codon | Frequency of use | RSCU |
|------------|-------|------------------|------|------------|-------|------------------|------|
| Phe        | UUU   | 492              | 1.14 | Tyr        | UAU   | 252              | 1.26 |
|            | UUC   | 368              | 0.86 |            | UAC   | 148              | 0.74 |
|            | UUA   | 278              | 1.18 | TER        | UAA   | 66               | 0.81 |
|            | UUG   | 286              | 1.21 |            | UAG   | 103              | 1.27 |
| Leu        | CUU   | 289              | 1.22 | His        | CAU   | 224              | 1.28 |
|            | CUC   | 181              | 0.77 |            | CAC   | 127              | 0.72 |
|            | CUA   | 244              | 1.03 | Gln        | CAA   | 241              | 1.32 |
|            | CUG   | 140              | 0.59 |            | CAG   | 125              | 0.68 |
| Ile        | AUU   | 399              | 1.21 | Asn        | AAU   | 264              | 1.18 |
|            | AUC   | 314              | 0.96 |            | AAC   | 183              | 0.82 |
|            | AUA   | 273              | 0.83 | Lys        | AAA   | 334              | 1.13 |
|            | AUG   | 318              | 1    |            | AAG   | 259              | 0.87 |
| Val        | GUU   | 235              | 1.28 | Asp        | GAU   | 232              | 1.26 |
|            | GUC   | 147              | 0.80 |            | GAC   | 136              | 0.74 |
|            | GUA   | 201              | 1.10 | Glu        | GAA   | 352              | 1.30 |
|            | GUG   | 149              | 0.81 |            | GAG   | 188              | 0.70 |
| Ser        | UCU   | 278              | 1.40 | Cys        | UGU   | 126              | 1.04 |
|            | UCC   | 206              | 1.04 |            | UGC   | 117              | 0.96 |
|            | UCA   | 224              | 1.13 | TER        | UGA   | 74               | 0.91 |
|            | UCG   | 170              | 0.85 | Trp        | UGG   | 225              | 1    |
| Pro        | CCU   | 228              | 1.37 | Arg        | CGU   | 151              | 1.05 |
|            | CCC   | 136              | 0.82 |            | CGC   | 69               | 0.48 |
|            | CCA   | 188              | 1.13 |            | CGA   | 166              | 1.16 |
|            | CCG   | 115              | 0.69 | Ser        | CGG   | 123              | 0.86 |
| Thr        | ACU   | 183              | 1.22 |            | AGU   | 177              | 0.89 |
|            | ACC   | 144              | 0.96 |            | AGC   | 139              | 0.70 |
|            | ACA   | 163              | 1.09 | Arg        | AGA   | 227              | 1.58 |
|            | ACG   | 108              | 0.72 |            | AGG   | 124              | 0.87 |
| Ala        | GCU   | 225              | 1.43 | Gly        | GGU   | 242              | 1.23 |
|            | GCC   | 142              | 0.90 |            | GGC   | 105              | 0.53 |
|            | GCA   | 152              | 0.96 |            | GGA   | 274              | 1.39 |
|            | GCG   | 112              | 0.71 |            | GGG   | 166              | 0.84 |

**Table S4** Specific characteristics of MTPTs in the *R. chingii* mitogenome

| MTPT | Aligned<br>length<br>(bp) | Mitogenome |         | Plastome |         | Contained<br>genes                                                                    |
|------|---------------------------|------------|---------|----------|---------|---------------------------------------------------------------------------------------|
|      |                           | Start      | End     | Start    | End     |                                                                                       |
| 1    | 465                       | 10,159     | 9,694   | 84,906   | 85,371  | patial-rpl2 <sup>2</sup>                                                              |
| 2    | 162                       | 36,394     | 36,232  | 30,344   | 30,510  | trnD-GUG <sup>2</sup>                                                                 |
| 3    | 180                       | 36,876     | 37,056  | 45,239   | 45,419  | trnS-GGA <sup>1,2</sup>                                                               |
| 4    | 187                       | 37,062     | 37,249  | 45,994   | 46,186  | partial-rps4 <sup>2</sup>                                                             |
| 5    | 360                       | 59,198     | 58,838  | 102,321  | 102,681 | partial-ycf68 <sup>2</sup> , partial-trnL-CAA <sup>2</sup>                            |
| 6    | 290                       | 65,659     | 65,369  | 476      | 766     | -                                                                                     |
| 7    | 864                       | 101,618    | 100,754 | 19,726   | 20,590  | partial-rpoC1 <sup>2</sup>                                                            |
| 8    | 359                       | 144,931    | 145,290 | 106,799  | 107,154 | -                                                                                     |
| 9    | 137                       | 208,390    | 208,253 | 1,370    | 1,507   | -                                                                                     |
| 10   | 124                       | 209,749    | 209,873 | 92,997   | 93,121  | -                                                                                     |
| 11   | 2829                      | 214,094    | 211,265 | 102,977  | 105,806 | trnI-GAU <sup>2</sup> , trnA-UGC <sup>2</sup>                                         |
| 12   | 232                       | 219,103    | 219,335 | 21,268   | 21,500  | partial-rpoC2 <sup>2</sup>                                                            |
| 13   | 262                       | 292,436    | 292,174 | 101,616  | 101,879 | -                                                                                     |
| 14   | 4512                      | 309,629    | 305,117 | 94,180   | 98,692  | trnL-CAA <sup>1,2</sup> , rps7 <sup>1,2</sup> , ndhB <sup>1,2</sup>                   |
| 15   | 132                       | 345,919    | 345,787 | 4,269    | 4,401   | -                                                                                     |
| 16   | 288                       | 399,455    | 399,743 | 101,060  | 101,348 | -                                                                                     |
| 17   | 1167                      | 430,152    | 428,985 | 85,381   | 86,548  | partial-ccmC <sup>1</sup> , rpl23 <sup>1,2</sup> , trnI-CAU <sup>2</sup>              |
| 18   | 2354                      | 464,710    | 462,356 | 23,311   | 25,665  | partial-rpoB <sup>2</sup>                                                             |
| 19   | 1206                      | 465,904    | 464,698 | 21,619   | 22,825  | -                                                                                     |
| 20   | 653                       | 632,530    | 631,877 | 66,587   | 67,251  | petG <sup>2</sup>                                                                     |
| 21   | 111                       | 632,619    | 632,508 | 66,164   | 66,275  | -                                                                                     |
| 22   | 1401                      | 634,228    | 632,827 | 64,773   | 66,173  | psbJ <sup>1,2</sup> , psbL <sup>1,2</sup> , psbF <sup>1,2</sup> , psbE <sup>1,2</sup> |
| 23   | 242                       | 700,268    | 700,026 | 1,162    | 1,405   | partial-psbA <sup>2</sup>                                                             |
| 24   | 172                       | 780,138    | 779,966 | 38,695   | 38,866  | partial-psaB <sup>2</sup>                                                             |

Note: <sup>1</sup>, gene in mitogenome; <sup>2</sup>, gene in plastome; partial-, gene fragments exist in MTPTs.

**Table S5** Shared genes and endemic genes in the three species (*R. chingii*, *P. chinensis*, *A. indica* )

|                     | mitogenome                                                                                                                                                                                                         |                                                                     | plastome                                                                                                                                         |                                                                                                                                                                                                                                                                                                                                                                               |
|---------------------|--------------------------------------------------------------------------------------------------------------------------------------------------------------------------------------------------------------------|---------------------------------------------------------------------|--------------------------------------------------------------------------------------------------------------------------------------------------|-------------------------------------------------------------------------------------------------------------------------------------------------------------------------------------------------------------------------------------------------------------------------------------------------------------------------------------------------------------------------------|
|                     | share gene                                                                                                                                                                                                         | Endemic gene                                                        | share gene                                                                                                                                       | Endemic gene                                                                                                                                                                                                                                                                                                                                                                  |
| <i>R. chingii</i>   | <i>atp1, atp4, atp6, atp8, atp9, ccmB, ccmC, ccmFc, ccmFn, cob, cox1, cox2, cox3, mttB, matR, nad1, nad2, nad3, nad4, nad4L, nad5, nad6, nad7, nad9, rpl2, rpl5, rpl10, rpl16, rps3, rps4, rps12, rps13, rps14</i> | <i>rps10, rps7, rpl23, sdh3, sdh4, ndhB, psbE, psbF, psbJ, psbL</i> | <i>clpP, rpl2, rpl14, rpl16, rpl20, rpl22, rpl23, rpl33, rpl36, rps2, rps3, rps4, rps7, rps8, rps11, rps12, rps14, rps16, rps18, rps19, ycf2</i> | <i>accD, atpA, atpB, atpE, atpF, atpH, atpI, ccsA, cemA, matK, ndhA, ndhB, ndhC, ndhD, ndhE, ndhF, ndhG, ndhH, ndhI, ndhJ, ndhK, petA, petB, petD, petG, petL, petN, psaA, psaB, psaC, psaI, psaJ, psbA, psbB, psbC, psbD, psbE, psbF, psbH, psbI, psbJ, psbK, psbL, psbM, psbN, psbT, psbZ, rbcL, rpl32, rpoA, rpoB, rpoC1, rpoC2, rps15, ycf1, ycf3, ycf4, ycf15, ycf68</i> |
| <i>P. chinensis</i> |                                                                                                                                                                                                                    | <i>rps10, sdh3, sdh4</i>                                            |                                                                                                                                                  | <i>atpA, atpB, atpE, atpF, atpH, atpI, cemA, infA, petA, petB, petD, petG, petL, petN, psaA, psaB, psaI, psaJ, psbA, psbB, psbC, psbD, psbE, psbF, psbH, psbI, psbJ, psbK, psbL, psbM, psbN, psbT, psbZ, rbcL, rpoA, rpoB, rpoC1, rpoC2, ycf3, ycf4</i>                                                                                                                       |
| <i>A. indica</i>    |                                                                                                                                                                                                                    | -                                                                   |                                                                                                                                                  | <i>accD, matK, rps15, ycf1</i>                                                                                                                                                                                                                                                                                                                                                |

**Table S6** Characterization of the sequence matrices used for organellar phylogenetic inference.

|            | Total number<br>of sites | Sites with alignment<br>gaps or missing data | Invariable<br>sites | Singleton<br>variable<br>sites | Parsimony<br>informative<br>sites |
|------------|--------------------------|----------------------------------------------|---------------------|--------------------------------|-----------------------------------|
| Mitogenome | 29,713                   | 9.03%                                        | 26,690              | 2,363                          | 660                               |
| Plastome   | 82,350                   | 26.72%                                       | 67,326              | 10,599                         | 4,465                             |

**Table S7** Characterizations of mitogenomes of 11 Lamiales species.

| Species                          | Family           | Total length (bp) | Gene number | CDS number | GC%  |
|----------------------------------|------------------|-------------------|-------------|------------|------|
| <i>Pedicularis chinensis</i>     | Orobanchaceae    | 225,612           | 62          | 37         | 44.4 |
| <i>Pedicularis kansuensis</i>    | Orobanchaceae    | 273,598           | 63          | 37         | 44.3 |
| <i>Castilleja paramensis</i>     | Orobanchaceae    | 495,499           | 68          | 36         | 43.5 |
| <i>Aeginetia indica</i>          | Orobanchaceae    | 420,362           | 55          | 33         | 43.5 |
| <i>Rehmannia chingii</i>         | Orobanchaceae    | 783,161           | 77          | 47         | 44.8 |
| <i>Rehmannia glutinosa</i>       | Orobanchaceae    | 547,032           | 71          | 44         | 45.0 |
| <i>Salvia miltiorrhiza</i>       | Lamiaceae        | 499,236           | 69          | 42         | 44.4 |
| <i>Utricularia reniformis</i>    | Lentibulariaceae | 857,234           | 68          | 40         | 44.0 |
| <i>Aragoa cleefii</i>            | Plantaginaceae   | 365,824           | 55          | 34         | 44.9 |
| <i>Dorcocheras hygrometricum</i> | Gesneriaceae     | 510,519           | 60          | 29         | 43.3 |
| <i>Osmanthus fragrans</i>        | Oleaceae         | 563,202           | 74          | 44         | 44.6 |

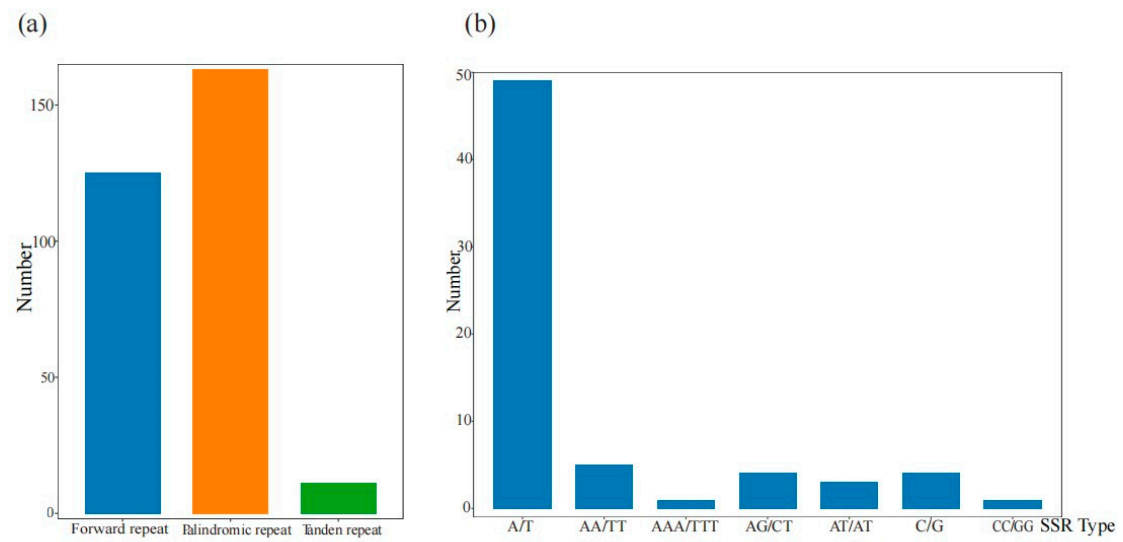

**Figure S1.** Repeat analysis of *R. chingii* mitogenome. (a) Repeat sequence statistics in the *R. chingii* mitogenome. (b) SSR statistics in the *R. chingii* mitogenome.
